# Supplementary material for: Twice exploration of tRNA +1 frameshifting in an elongation cycle of protein synthesis
Source: PubMed Central journal article supplement — Nucleic Acids Res. 2021 Aug 20;49(17):10046–60. doi: 10.1093/nar/gkab734 (PMC8464047; doi:10.1093/nar/gkab734), 2021-08-20
Supplement: gkab734_supplemental_file.pdf [file gkab734_supplemental_file.pdf]

## Supplementary Information

### Twice exploration of tRNA +1 frameshifting in an elongation cycle of protein synthesis

Howard Gamper<sup>1,5</sup>, Yujia Mao<sup>2,5</sup>, Isao Masuda<sup>1</sup>, Henri McGuigan<sup>1</sup>, Gregor Blaha<sup>3</sup>,  
Yuhong Wang<sup>4</sup>, Shoujun Xu<sup>2</sup>, and Ya-Ming Hou<sup>1,\*</sup>

<sup>1</sup>Department of Biochemistry and Molecular Biology, Thomas Jefferson University,  
Philadelphia, PA 19107, USA

<sup>2</sup>Department of Chemistry, University of Houston, Houston, TX 77204, USA

<sup>3</sup>Department of Biochemistry, University of California, Riverside, CA 92521, USA

<sup>4</sup>Department of Biology and Biochemistry, University of Houston, Houston, TX 77204,  
USA

<sup>5</sup>These authors contributed equally to this work.

\*Corresponding author:

[ya-ming.hou@jefferson.edu](mailto:ya-ming.hou@jefferson.edu) (T) 215-503-4480; (F) 215-503-4954

ORCID: 0000-0001-6546-2597

Figure S1

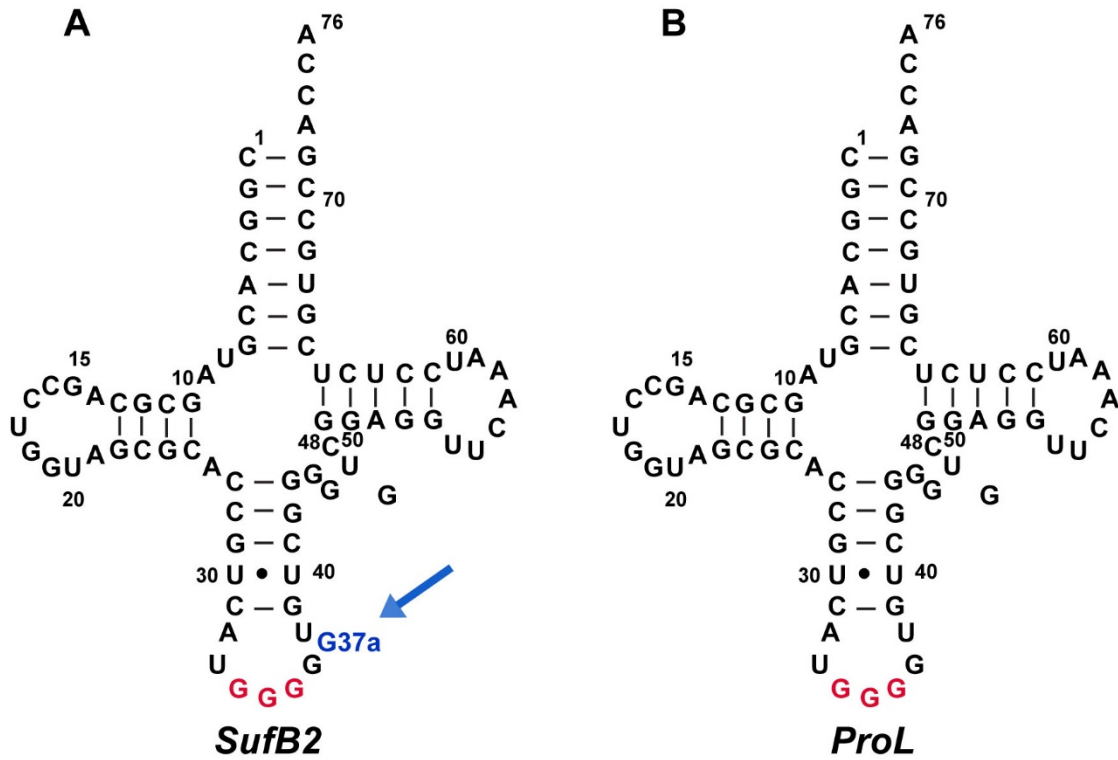

Figure S1. Sequences and cloverleaf structures of *Salmonella SufB2* and *ProL* tRNAs, which are synthesized by *in vitro* transcription for this study. *SufB2* has the insertion of G37a next to G37 in the anticodon loop of *ProL*. The anticodon GGG in both tRNAs are shown in red.

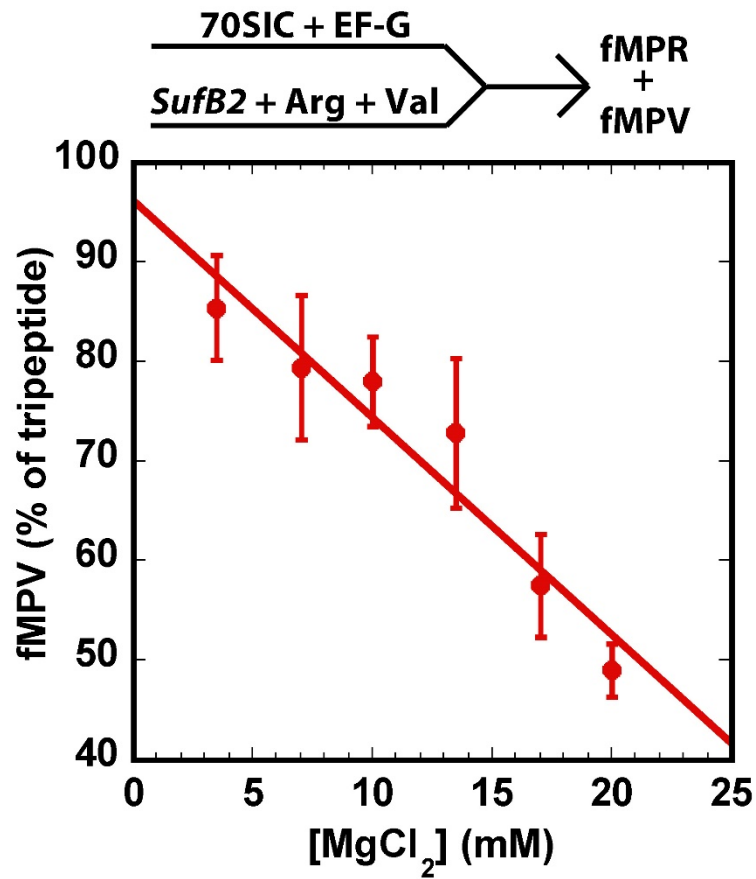

Figure S2. A kinetic assay for the fractional distribution (%) of fMPV after translocation of *SufB2* into the P site as a function of  $Mg^{2+}$  concentration. This fractional distribution represents the sub-population of *SufB2* in the +1-frame of the P site.

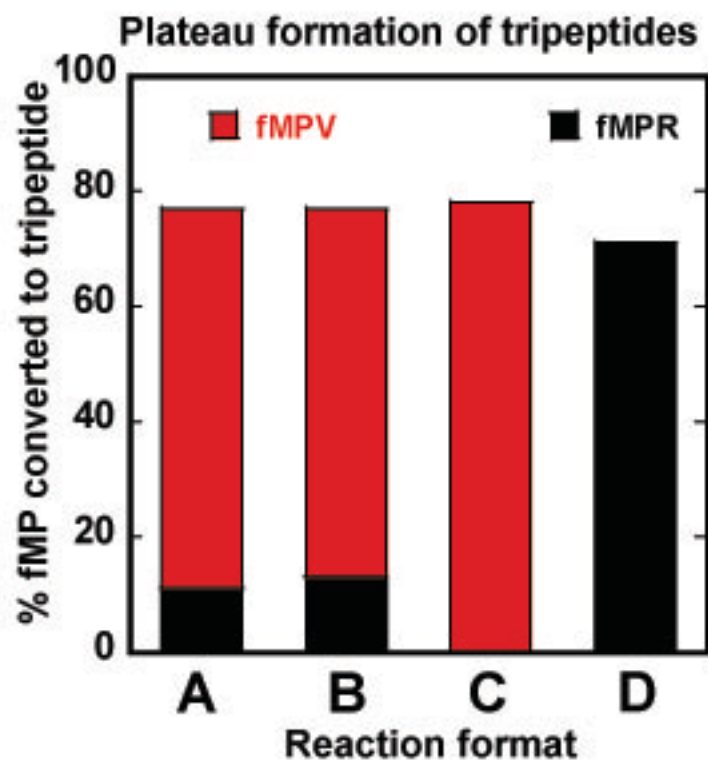

Figure S3. Analysis of the fractional conversion of fMP to fMPV or fMPR obtained under the four reaction schemes of Figure 5. The fractional conversion is calculated as the % of fMP that is converted to fMPV or fMPR. In contrast, the conversions shown in Figure 5 are calculated as the % of fMPV or fMPR in the sum of both tripeptides (fMPV + fMPR).
